# Supplementary material for: Absence of p53-Dependent Apoptosis Combined With Nonhomologous End-Joining Deficiency Leads to a Severe Diabetic Phenotype in Mice
Source: PubMed Central journal article supplement — Diabetes. 2009 Oct 15;59(1):135–42. doi: 10.2337/db09-0792 (PMC2797914; doi:10.2337/db09-0792), 2009-10-15
Supplement: supp_db09-0792_db09-0792_online_appendix.pdf [file supp_db09-0792_db09-0792_online_appendix.pdf]

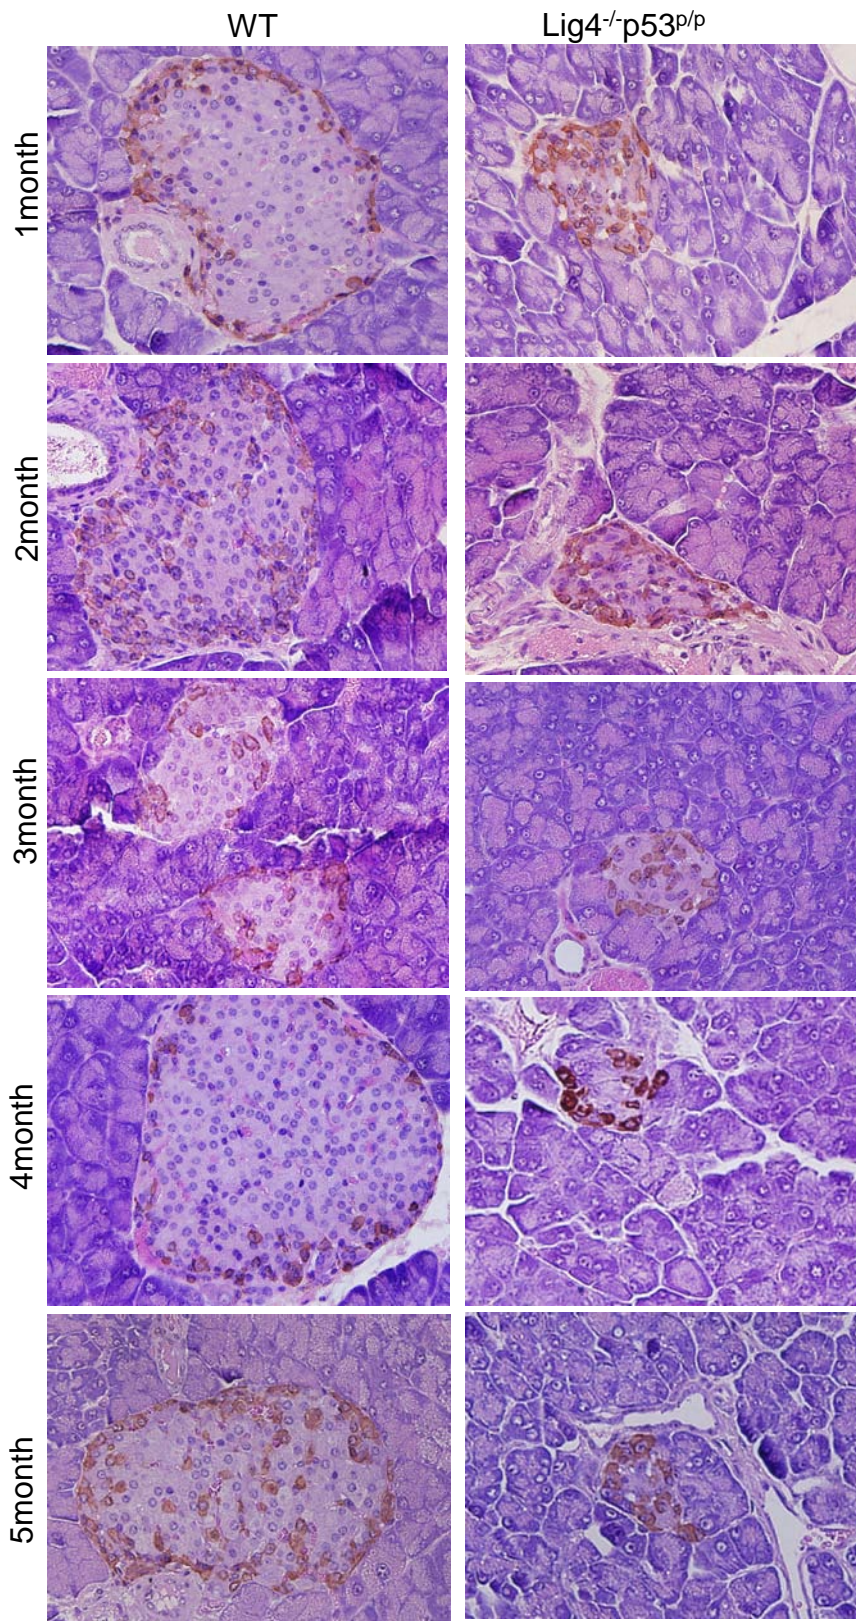

**Figure S1. Progressive reduction of pancreatic islets in Lig4<sup>-/-</sup>p53<sup>p/p</sup> mice.** Representative pancreatic sections from Lig4<sup>-/-</sup>p53<sup>p/p</sup> and wild-type mice were immunohistochemically stained with anti-glucagon antibody (brown).

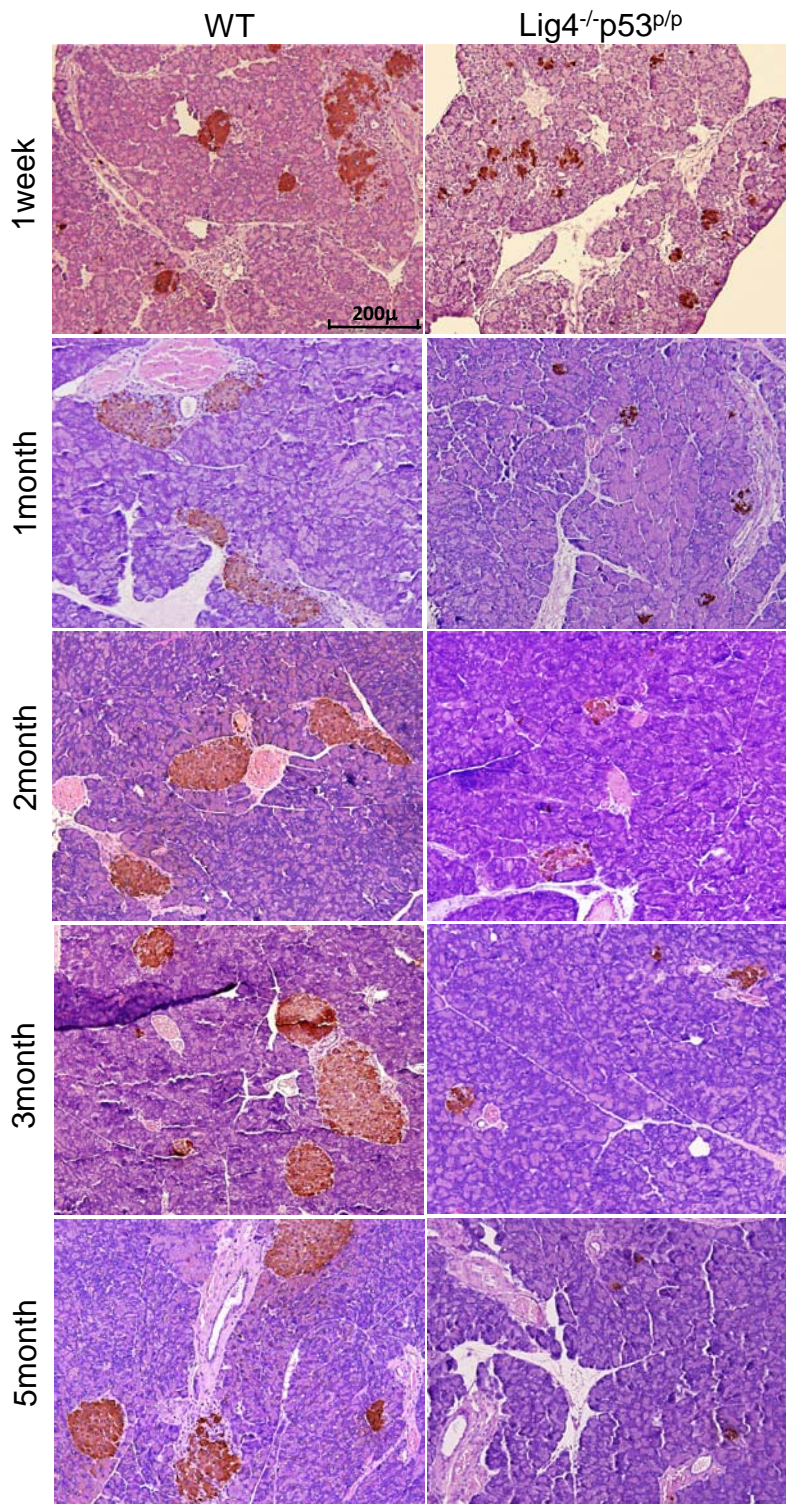

**Figure S2. Progressive reduction of pancreatic islets in Lig4<sup>-/-</sup>p53<sup>D/p</sup> mice.** Representative pancreatic sections from Lig4<sup>-/-</sup>p53<sup>D/p</sup> and wild-type mice were stained with anti-insulin antibody (brown).

## Supplemental Material

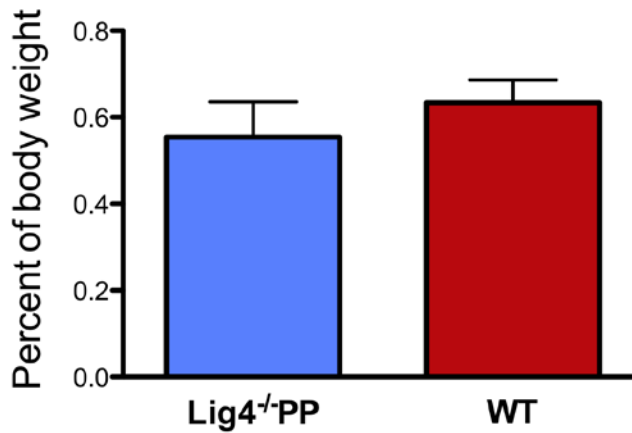

**Figure S3. Comparison of ratio of pancreas to body weight in Lig4<sup>-/-</sup>p53<sup>pp</sup> and wild-type mice.** Lig4<sup>-/-</sup>p53<sup>pp</sup> mice are smaller, approximately one third of body weight compare to wild-type littermates. The Lig4<sup>-/-</sup>p53<sup>pp</sup> mice have proportional smaller pancreas. There is not significant difference between the ratio of pancreas to body weight between mutant and wild-type mice.

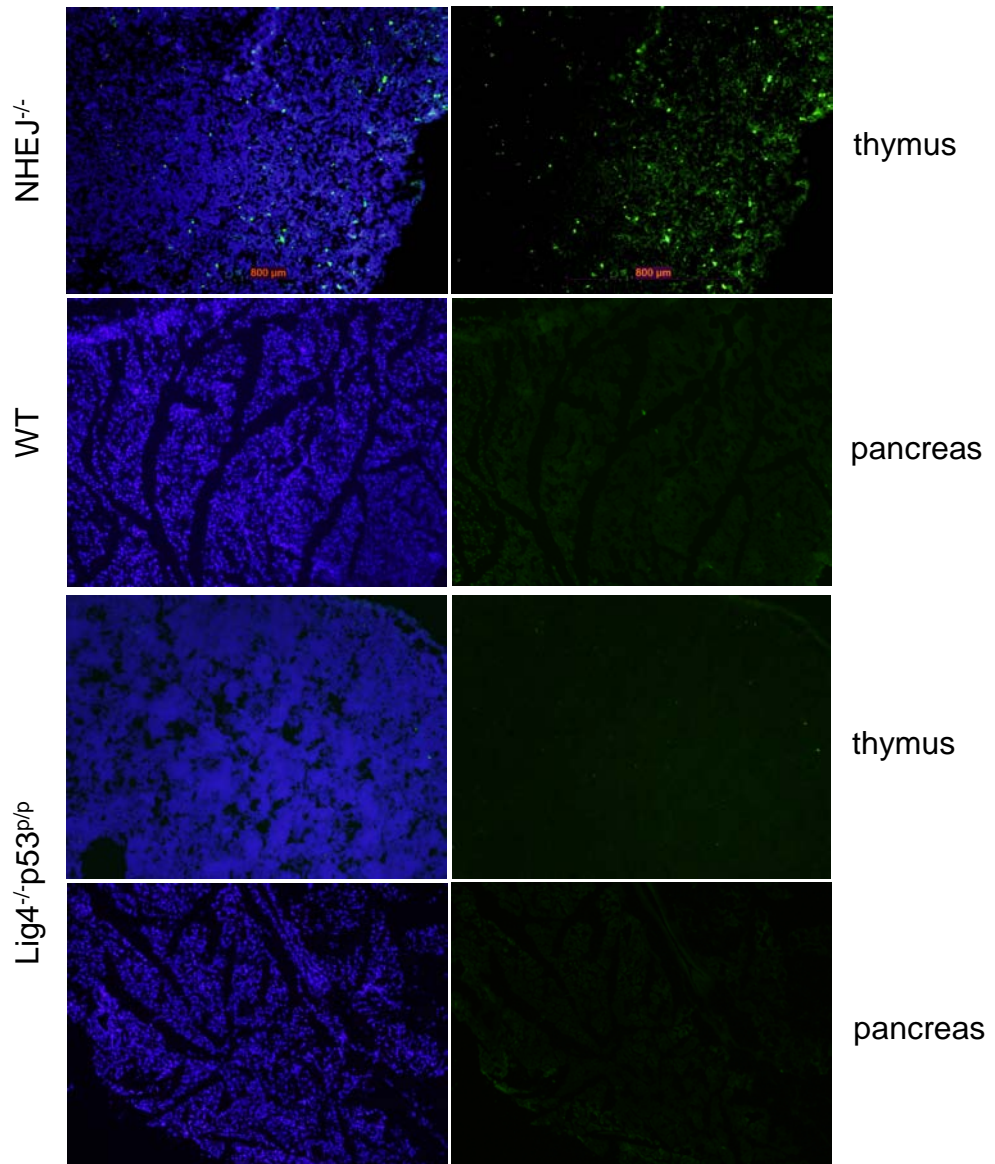

**Figure S4. Absence of apoptosis in the Lig4<sup>-/-</sup>p53<sup>pp</sup> thymus and pancreas.**

Pancreatic sections from mutant and age-matched wild-type mice were analyzed with a TUNEL assay; no apoptotic cells detected pancreas and thymus sections of Lig4<sup>-/-</sup>p53<sup>pp</sup>. A NHEJ<sup>-/-</sup> (Artemis deficient) thymus was used as a positive control. Magnification: 10X.

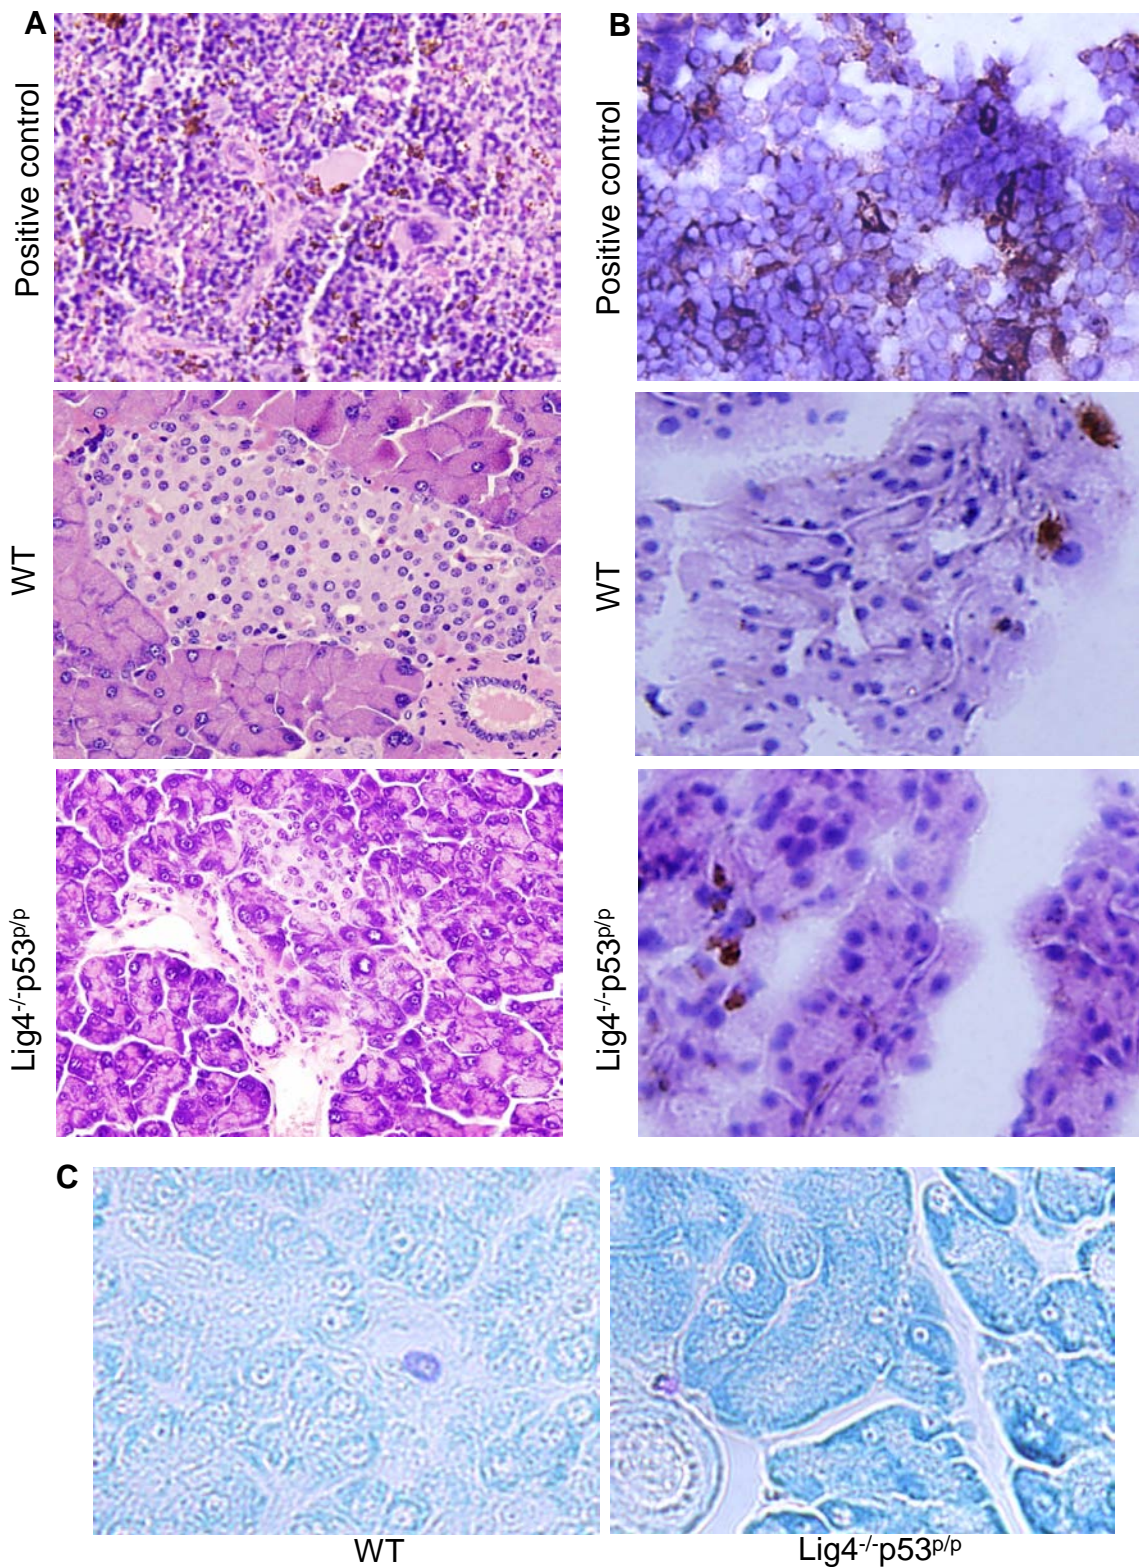

**Figure S5. Islet depletion is not due to innate immunity.**

Pancreatic sections from mutant and age-matched wild-type mice were stained using anti-CD11b antibody (A), with wild-type spleen section as a positive control, and anti-F4-80 (B) with wild-type bone marrow cells as a positive control. Toluidine blue staining for mast cells (C) showing very few infiltration cells in frozen sections. Magnification: 40X.

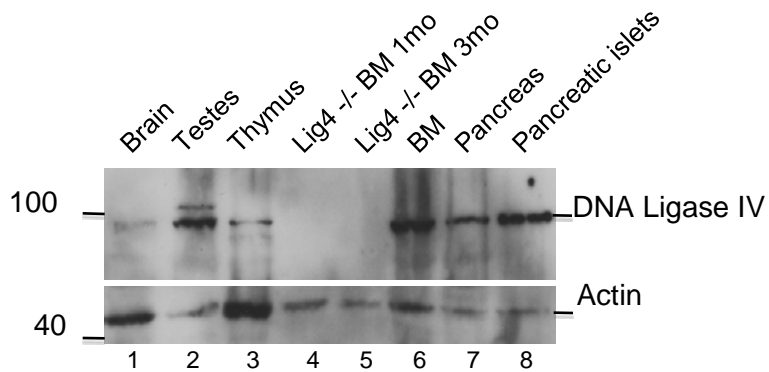

**Figure S6. Western blot analysis of DNA ligase IV in Lig4<sup>-/-</sup>p53<sup>pp</sup> and wild-type mice.** High level of DNA ligase IV is detected in wild-type pancreatic islets, as compatible to the level detected in testes. Pancreatic islets were purified according to a protocol by Gregory L. Szot, Pavel Koudria, Jeffrey A. Bluestone (2007) Murine Pancreatic Islet Isolation. JoVE. 7. <http://www.jove.com/index/details.stp?id=255>
